# Supplementary material
Source: PubMed Central journal article supplement (PMC4135842)
Supplement: AAC.02395-14_zac009143202so1.pdf [file AAC.02395-14_zac009143202so1.pdf]

**Figure S1.** Examples of LC-MS of some peptides used in this study.

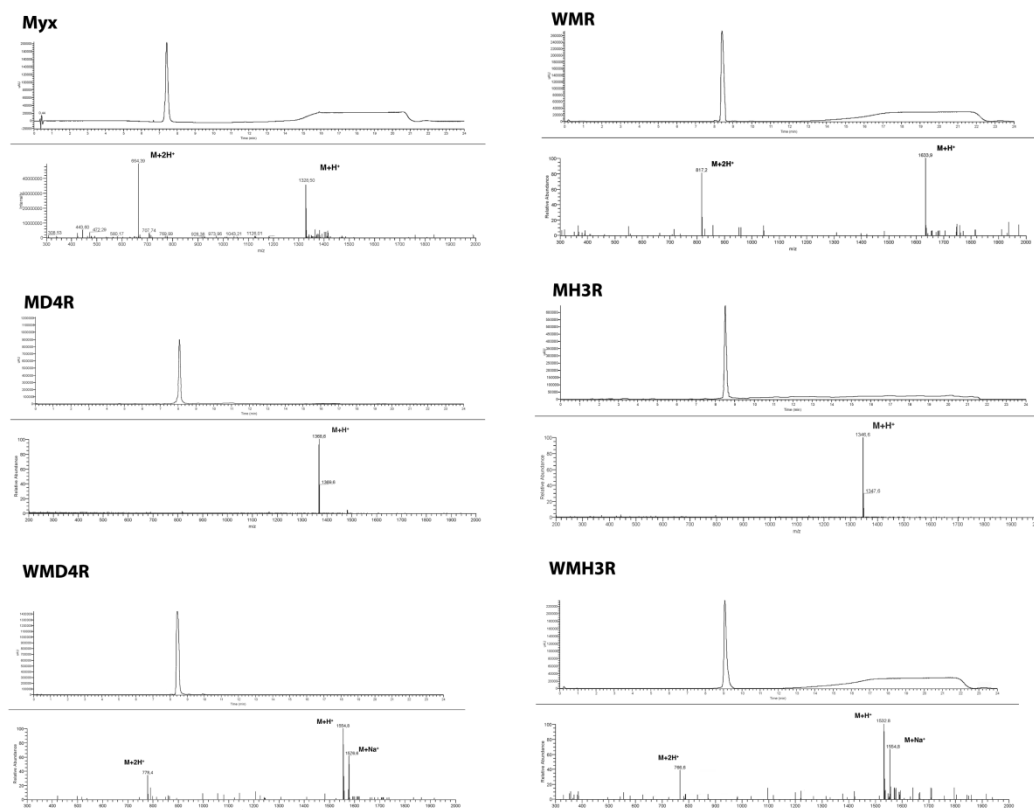

**Figure S2.** A) 2D [<sup>1</sup>H, <sup>1</sup>H] NOESY spectrum of Myxinidin acquired in 10 mM sodium phosphate buffer pH=7.4; B) One dimensional proton spectra of Myxinidin in phosphate buffer (red) and in presence of TFE (50/50 v/v) (black). The H<sub>N</sub> and aromatic proton region is reported in panel B.

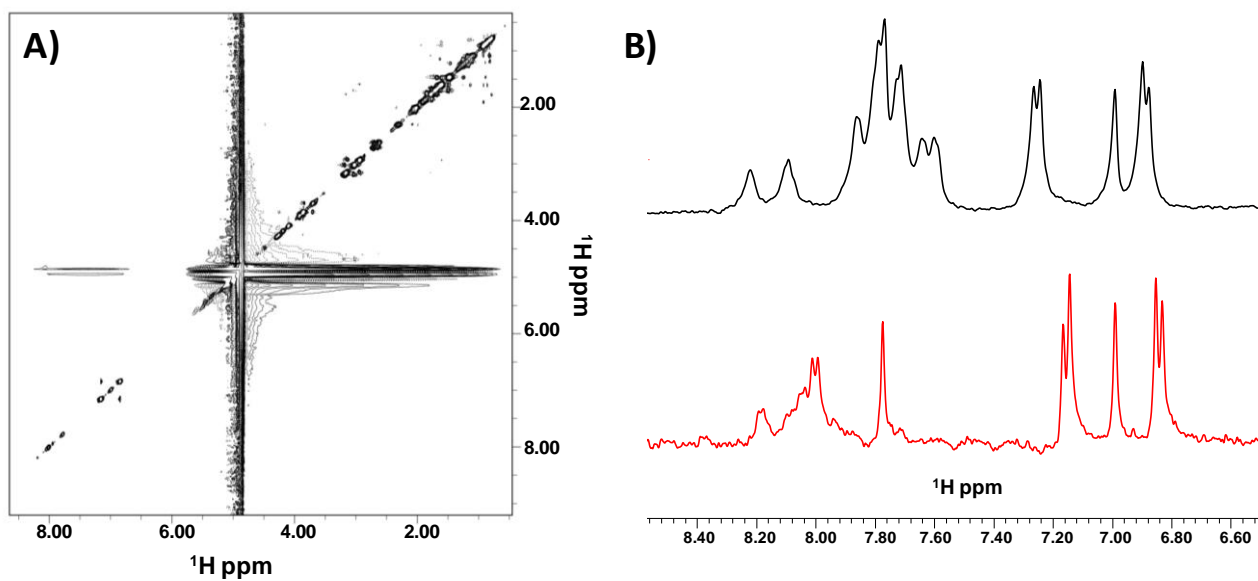

**Figure S3.** Comparison of 2D [ $^1\text{H}$ ,  $^1\text{H}$ ] TOCSY (right side) and 2D [ $^1\text{H}$ ,  $^1\text{H}$ ] NOESY (left side) of Myxinidin in phosphate buffer/TFE (50/50 v/v).

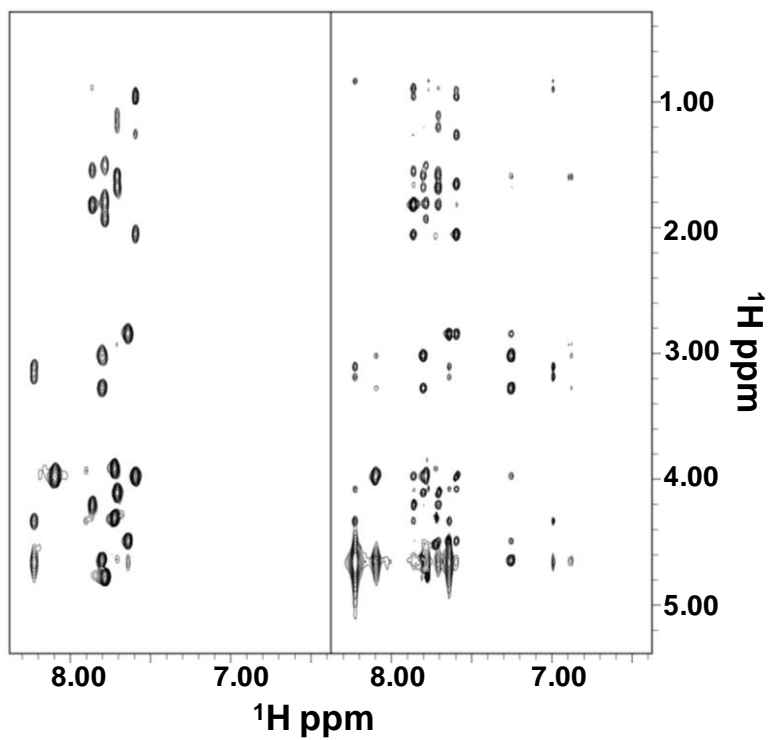

**Figure S4.** H $\alpha$  chemical shift deviations from random coil values ( $\delta_{obs}-\delta_{rc}$ ) evaluated in a solution containing 50% TFE. Data are set equal to zero for the unassigned H $\alpha$  chemical shift of Gly1.

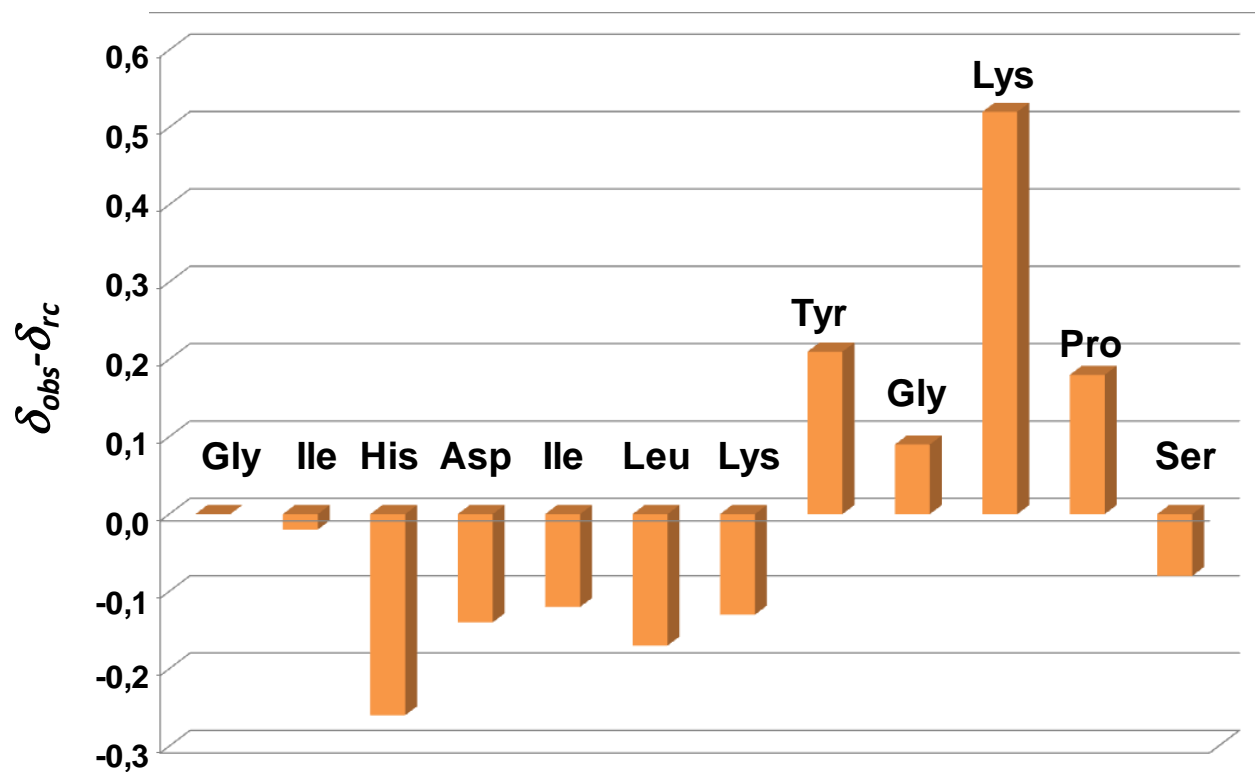

**Table S1.** Chemical shifts ppm of Myxinidin evaluated at 298 K in 10 mM sodium phosphate buffer pH=7.4/TFE (50/50 v/v).

| <b>Residue</b> | <b>H<sub>N</sub></b> | <b>H<sub>α</sub></b> | <b>H<sub>β</sub></b> | <b>H<sub>γ</sub></b>                                                                  | <b>Others</b>                                |
|----------------|----------------------|----------------------|----------------------|---------------------------------------------------------------------------------------|----------------------------------------------|
| <b>1Gly</b>    |                      |                      |                      |                                                                                       |                                              |
| <b>2Ile</b>    |                      | 4.07                 | 1.84                 | H <sub>γ</sub> CH <sub>2</sub><br>1.28-1.42<br>H <sub>γ</sub> CH <sub>3</sub><br>0.84 | Hδ <sub>CH<sub>3</sub></sub> 0.92            |
| <b>3His</b>    | 8.22                 | 4.33                 | 3.10-3.19            |                                                                                       | Hδ <sub>2</sub> 6.99<br>Hε <sub>1</sub> 7.78 |
| <b>4Asp</b>    | 7.64                 | 4.49                 | 2.83-2.85            |                                                                                       |                                              |
| <b>5Ile</b>    | 7.59                 | 3.97                 | 2.05                 | H <sub>γ</sub> CH <sub>2</sub><br>1.26-1.64<br>H <sub>γ</sub> CH <sub>3</sub><br>0.98 | Hδ <sub>CH<sub>3</sub></sub> 0.88            |
| <b>6Leu</b>    | 7.86                 | 4.18                 | 1.56-1.81            | 1.82                                                                                  | 0.88-0.92                                    |
| <b>7Lys</b>    | 7.70                 | 4.10                 | 1.59-1.68            | 1.12-1.20                                                                             | Hδ 1.61<br>Hε 2.93                           |
| <b>8Tyr</b>    | 7.80                 | 4.64                 | 3.01-3.27            |                                                                                       | Hδ 7.25<br>Hε 6.90                           |
| <b>9Gly</b>    | 8.09                 | 3.97                 |                      |                                                                                       |                                              |
| <b>10Lys</b>   | 7.78                 | 4.75                 | 1.80-1.93            | 1.51                                                                                  | Hδ 1.75<br>Hε 3.06                           |
| <b>11Pro</b>   |                      | 4.51                 | 2.32                 | 2.06-2.10                                                                             | Hδ 3.74-3.84                                 |
| <b>12Ser</b>   | 7.72                 | 4.30                 | 3.91                 |                                                                                       |                                              |

**Table S2.** Statistics for Myxinidin NMR ensemble of structures.

|                                                |           |
|------------------------------------------------|-----------|
| <b>NOE upper distance limits</b>               | 142       |
| <b>Angle constraints</b>                       | 42        |
| <b>Residual target function, Å<sup>2</sup></b> | 0.35      |
| <b>Residual NOE violations</b>                 |           |
| Total Number                                   | 2         |
| Number >0.2 Å                                  | 2         |
| Maximum violation, Å                           | 0.27      |
| <b>Residual angle violations</b>               |           |
| Total Number                                   | 0         |
| <b>Atomic pairwise RMSD, Å</b>                 |           |
| Backbone atoms (a.a. 2-9)                      | 0.24±0.06 |
| <b>Ramachandran statistics<sup>&amp;</sup></b> |           |
| Residues in core regions                       | 92.2%     |
| Residues in allowed regions                    | 6.1%      |
| Residues in generous regions                   | 1.7%      |
| Residues in disallowed regions                 | 0.0%      |

<sup>&</sup>Procheck NMR analysis (residues 1-12) (*Laskowski RA et al., (1996) AQUA and PROCHECK-NMR: programs for checking the quality of protein structures solved by NMR. J Biomol NMR, 8 (4): 477-486.*)

| <b>Table 3S.</b> Myxinidin analogues MIC on different microbial strains |                |                      |                       |                     |                  |
|-------------------------------------------------------------------------|----------------|----------------------|-----------------------|---------------------|------------------|
| MIC value ( $\mu\text{M}$ )                                             |                |                      |                       |                     |                  |
| <b>Peptide</b>                                                          | <i>E. coli</i> | <i>P. aeruginosa</i> | <i>S. typhimurium</i> | <i>K. pneumonia</i> | <i>S. aureus</i> |
| <b>Myxinidin</b>                                                        | 5              | 30                   | 20                    | 10                  | 10               |
| <b>G 1</b>                                                              | >50            | 10                   | 3                     | >50                 | 10               |
| <b>I 2</b>                                                              | >50            | >50                  | >50                   | >50                 | 30               |
| <b>H 3</b>                                                              | >50            | 15                   | 10                    | 30                  | 20               |
| <b>D 4</b>                                                              | >50            | >50                  | >50                   | 30                  | 5                |
| <b>I 5</b>                                                              | 20             | 10                   | 4                     | 20                  | 20               |
| <b>L 6</b>                                                              | >50            | >50                  | >50                   | 20                  | 5                |
| <b>K 7</b>                                                              | 15             | 15                   | 15                    | 20                  | 10               |
| <b>Y 8</b>                                                              | 20             | >50                  | >50                   | 20                  | 10               |
| <b>G 9</b>                                                              | 5              | 15                   | 10                    | 10                  | 10               |
| <b>K 10</b>                                                             | 15             | >50                  | >50                   | 10                  | 20               |
| <b>P 11</b>                                                             | >50            | 30                   | 10                    | 30                  | 10               |
| <b>S 12</b>                                                             | >50            | >50                  | >50                   | 30                  | >50              |

| <b>Table 4S.</b> Myxinidin analogues MIC on different microbial strains |                |                      |                       |                     |                  |
|-------------------------------------------------------------------------|----------------|----------------------|-----------------------|---------------------|------------------|
| MIC value ( $\mu\text{M}$ )                                             |                |                      |                       |                     |                  |
| <b>Peptide</b>                                                          | <i>E. coli</i> | <i>P. aeruginosa</i> | <i>S. typhimurium</i> | <i>K. pneumonia</i> | <i>S. aureus</i> |
| <b>Myxinidin *</b>                                                      | 5              | 30                   | 20                    | 10                  | 10               |
| <b>WMR-NH<sub>2</sub> *</b>                                             | 2              | 2                    | 1.2                   | 3                   | 2.2              |
| <b>WMR-COOH</b>                                                         | 10             | 4                    | 10                    | 20                  | 4                |
| <b>MH3R-NH<sub>2</sub> *</b>                                            | 5              | 20                   | 5                     | 5                   | 10               |
| <b>WMH3R-NH<sub>2</sub></b>                                             | 5              | 30                   | 25                    | 15                  | 5                |
| <b>WMH3R-COOH</b>                                                       | 15             | 5                    | 8                     | 30                  | 15               |
| <b>MD4R-NH<sub>2</sub> *</b>                                            | 2.2            | 10                   | 3                     | 3                   | 10               |

|                             |   |    |    |    |   |
|-----------------------------|---|----|----|----|---|
| <b>WMD4R-NH<sub>2</sub></b> | 8 | 35 | 12 | 6  | 4 |
| <b>WMD4R-COOH</b>           | 8 | 12 | 10 | 12 | 8 |

\* The data relative to these peptides have been obtained in a previous work (16).

| <b>Table 5S.</b> Lipid composition of different bacteria |                |                      |                       |                     |                  |
|----------------------------------------------------------|----------------|----------------------|-----------------------|---------------------|------------------|
| <b>lipid</b>                                             | <i>E. coli</i> | <i>P. aeruginosa</i> | <i>S. typhimurium</i> | <i>K. pneumonia</i> | <i>S. aureus</i> |
| <b>PE</b>                                                | 85             | 60                   | 76                    | 82                  | 0                |
| <b>PG</b>                                                | 10             | 21                   | 17                    | 5                   | 57               |
| <b>CL</b>                                                | 5              | 11                   | 7                     | 6                   | 19               |
